# Supplementary material for: Structural characteristics of (−)-epigallocatechin-3-gallate inhibiting amyloid Aβ42 aggregation and remodeling amyloid fibers
Source: Royal Society of Chemistry journal article supplement (doi:10.1039/c5ra09608a), 2015-01-01

**Table S1** Contents of secondary structure elements of A $\beta$ 42 during fibrillation in the absence and presence of EGCG analogs when added in the lag phase

|                    | Time (h) | Helix (%) | Sheet (%) | Turn (%) | Unordered (%) |
|--------------------|----------|-----------|-----------|----------|---------------|
| A $\beta$ 42 alone | 0        | 2.5       | 29.5      | 15.3     | 52.7          |
|                    | 3.2      | 4.9       | 38.6      | 22.5     | 34            |
|                    | 7        | 6         | 39.6      | 21.8     | 32.6          |
|                    | 13       | 4.4       | 44.2      | 19.9     | 31.5          |
|                    | 22       | 5.1       | 40.1      | 22.4     | 32.4          |
|                    | 36       | 5.2       | 38.9      | 21.9     | 34            |
| EGCG               | 3.2      | 19.2      | 35.9      | 21.2     | 23.7          |
|                    | 7        | 7.3       | 33.6      | 22.3     | 36.8          |
|                    | 13       | 12.2      | 20.7      | 22.3     | 44.8          |
|                    | 22       | 19.2      | 15.7      | 20.2     | 44.9          |
|                    | 36       | 19.1      | 15.5      | 20.5     | 44.9          |
| ECG                | 3.2      | 11.0      | 36.0      | 22.8     | 30.2          |
|                    | 7        | 12.2      | 38.2      | 21.3     | 28.3          |
|                    | 13       | 15.2      | 40.2      | 18.7     | 25.9          |
|                    | 22       | 19.8      | 32.7      | 19.9     | 27.6          |
|                    | 36       | 19.9      | 26.1      | 23.8     | 30.2          |
| EGC                | 3.2      | 8.1       | 37        | 21.8     | 33.1          |
|                    | 7        | 23.5      | 40        | 17.3     | 19.2          |
|                    | 13       | 6         | 42.2      | 20       | 31.8          |
|                    | 22       | 8.1       | 38        | 21.8     | 32.1          |
|                    | 36       | 10.3      | 32.1      | 22.3     | 35.2          |
| GCG                | 3.2      | 7         | 33.9      | 24.5     | 34.6          |
|                    | 7        | 9.8       | 31        | 24.7     | 34.5          |
|                    | 13       | 12.8      | 25.2      | 24.8     | 37.2          |
|                    | 22       | 16.7      | 18.6      | 24.6     | 40.1          |
|                    | 36       | 16.3      | 17.2      | 24.3     | 42.2          |

Triplicate experiments were conducted for each test and the standard errors were less than 12%.

**Table S2** Contents of secondary structure elements of A $\beta$ 42 during fibrillation in the presence of EGCG analogs when added in the growth phase

|                    | Time (h) | Helix (%) | Sheet (%) | Turn (%) | Unordered (%) |
|--------------------|----------|-----------|-----------|----------|---------------|
| A $\beta$ 42 alone | 10       | 5.3       | 40.2      | 22.4     | 32.1          |
| EGCG               | 14       | 8.9       | 38.1      | 22.1     | 30.9          |
|                    | 21       | 9.6       | 31.7      | 24.9     | 33.7          |
|                    | 28       | 9.3       | 30.7      | 24.5     | 35.5          |
|                    | 36       | 10.5      | 28.3      | 24.6     | 36.6          |
|                    | EGC      | 14        | 4.8       | 40.6     | 21.8          |
| EGC                | 21       | 7.8       | 38.5      | 21.9     | 32.7          |
|                    | 28       | 8.7       | 35.5      | 22.7     | 33            |
|                    | 36       | 9.8       | 34.2      | 24.9     | 31.1          |
|                    | EGC      | 14        | 8.8       | 41.2     | 23.4          |
| GCG                | 21       | 6.9       | 38.9      | 21.3     | 32.9          |
|                    | 28       | 7.1       | 37.8      | 21.7     | 33.4          |
|                    | 36       | 7.4       | 38        | 23.1     | 31.6          |
|                    | GCG      | 14        | 8.8       | 38.5     | 23.2          |
| GCG                | 21       | 10.4      | 35.2      | 22.2     | 32.2          |
|                    | 28       | 9.4       | 32.2      | 24.2     | 34.2          |
|                    | 36       | 10.1      | 30.7      | 24.6     | 34.6          |

Triplicate experiments were conducted for each test and the standard errors were less than 12%.

**Table S3** Contents of secondary structure elements of A $\beta$ 42 during fibrillation in the presence of EGCG analogs when added in the equilibrium phase

|                    | Time (h) | Helix (%) | Sheet (%) | Turn (%) | Unordered (%) |
|--------------------|----------|-----------|-----------|----------|---------------|
| A $\beta$ 42 alone | 24       | 4.2       | 42.2      | 21.2     | 32.4          |
| EGCG               | 25       | 4.5       | 41.8      | 20.5     | 33.2          |
|                    | 27       | 5.9       | 57.1      | 22.7     | 14.3          |
|                    | 30       | 1.7       | 38.9      | 28.8     | 30.6          |
|                    | 40       | 9.9       | 29.9      | 23.3     | 36.9          |
| ECG                | 25       | 17        | 43.7      | 18.7     | 20.6          |
|                    | 27       | 21.4      | 47.8      | 7.2      | 23.7          |
|                    | 30       | 18.2      | 38.7      | 20.5     | 22.6          |
|                    | 40       | 18.1      | 34.8      | 16.5     | 30.6          |
| EGC                | 25       | 6.4       | 41.7      | 20.6     | 31.3          |
|                    | 27       | 2.9       | 43.4      | 20.3     | 33.4          |
|                    | 30       | 3.3       | 45.3      | 20       | 31.4          |
|                    | 40       | 8.9       | 36.7      | 21.6     | 33.2          |
| GCG                | 25       | 5.5       | 41.7      | 19.9     | 34.7          |
|                    | 27       | 3.6       | 52.7      | 15.8     | 27.9          |
|                    | 30       | 8.5       | 33.9      | 22.3     | 35.3          |
|                    | 40       | 7.8       | 31.5      | 21.9     | 38.8          |

Triplicate experiments were conducted for each test and the standard errors were less than 12%.

Fig. S1

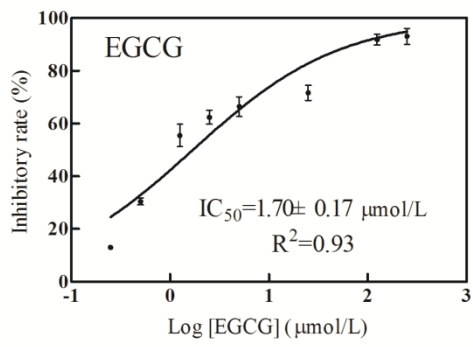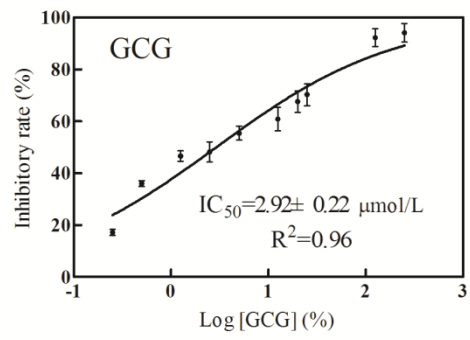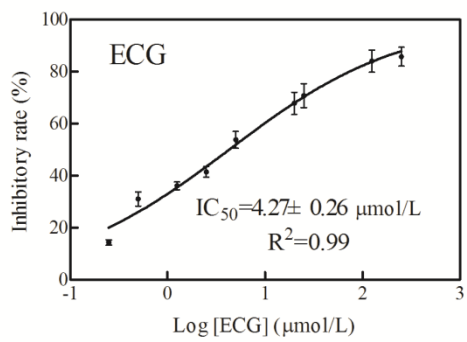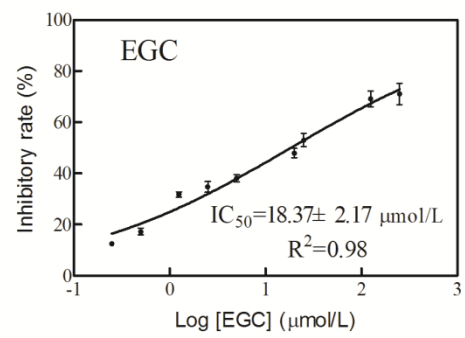

Supplement: c5ra09608a1.pdf [file c5ra09608a1.pdf]
